# Supplementary material
Source: publisher site journal article supplement (https://www.oncotarget.com/article/28626)
Supplement: Supplementary file 1 [file 28626]

## Addendum: Adopted neoplastic cells and the consequences of their existence

**Yuri Lazebnik<sup>1</sup>**

<sup>1</sup>Lerna Consulting, New Haven, CT 06511, USA

**Published:**

**Copyright:** © 2024 Lazebnik. This is an open access article distributed under the terms of the [Creative Commons Attribution License](#) (CC BY 4.0), which permits unrestricted use, distribution, and reproduction in any medium, provided the original author and source are credited.

**This article has an addendum:** This article received a publication fee waiver.

Original article: Oncotarget. 2023; 14:321–341. <https://doi.org/10.18632/oncotarget.28408>
